# Supplementary material
Source: publisher figshare collection journal article supplement (https://tandf.figshare.com/ndownloader/files/13005146)
Supplement: Supplementary file 1 [file 13005146]

**Supporting file**

**A facile method for precipitating of dispersed carbon particles prepared by microwave heating and its application for dye removal**

Fatemeh Seifikara, Saeid Aziziana,[[1]](#footnote-2)

*a Department of Physical Chemistry, Faculty of Chemistry, Bu-Ali Sina University, Hamedan, Iran*


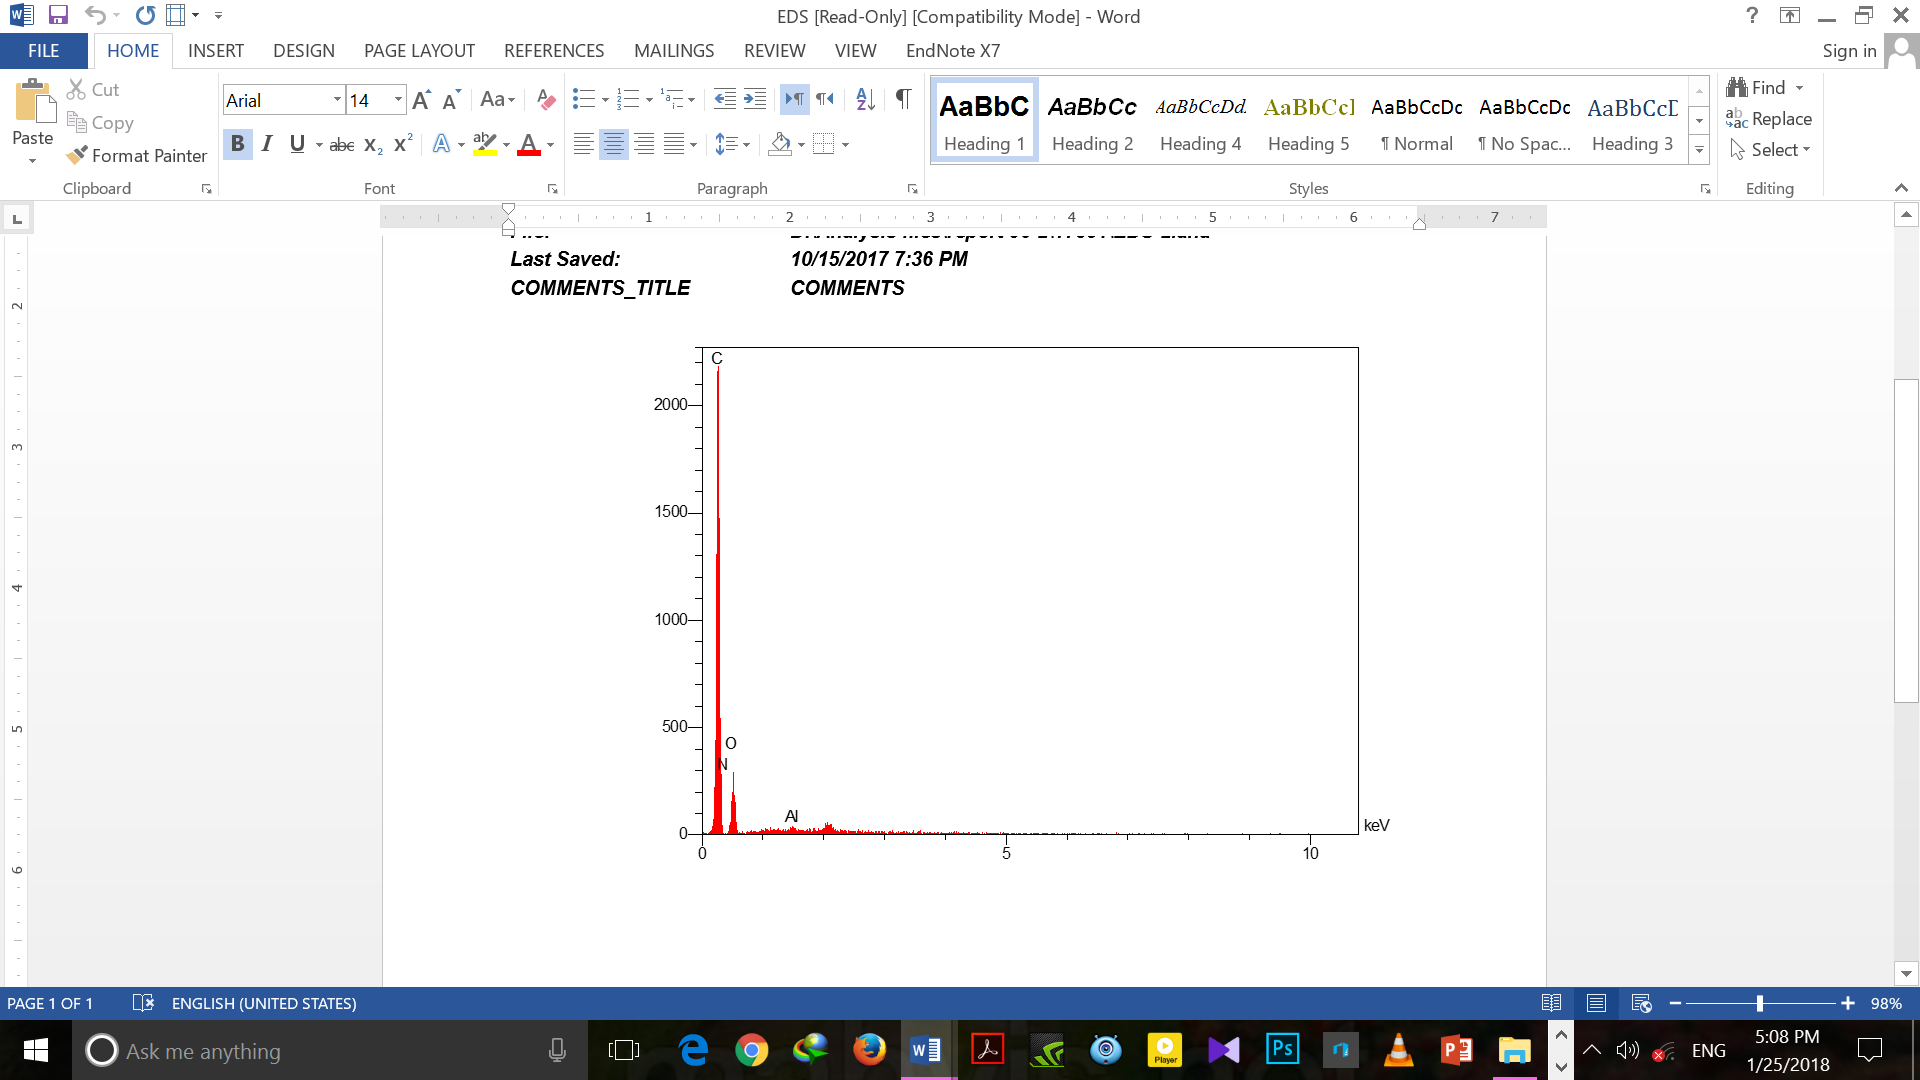


*Intensity*

*Binding energy* (k eV)

Fig. S1. The EDS spectra of the prepared carbon particles.


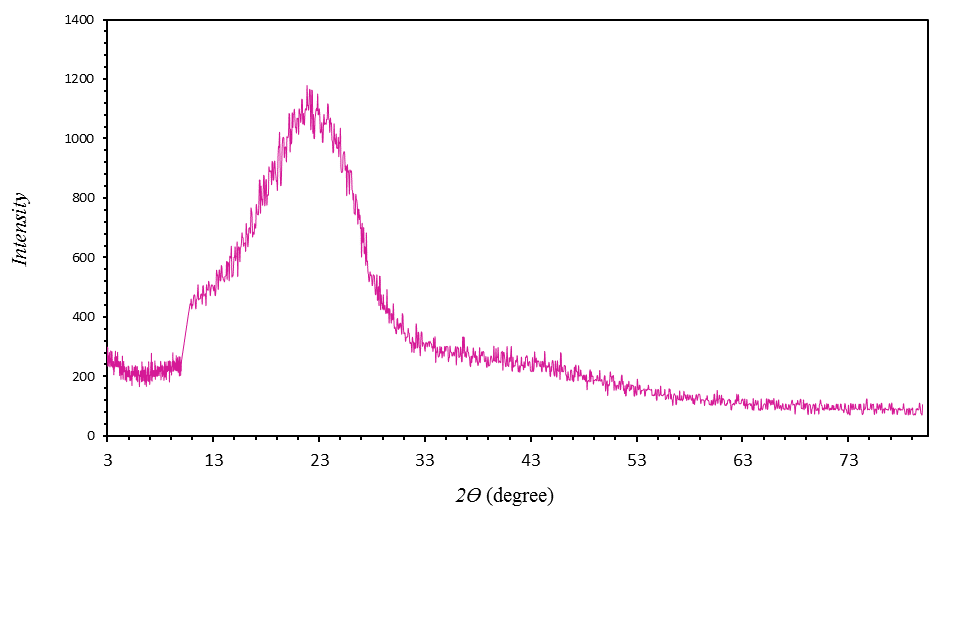


Fig. S2. The XRD pattern of the prepared carbon.


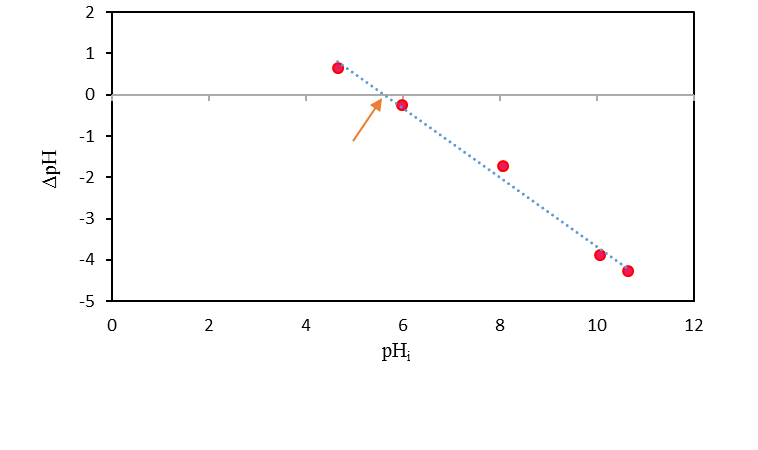


pHPZC

Fig. S3. Diagram of ∆pH versus pHi of the prepared carbon.


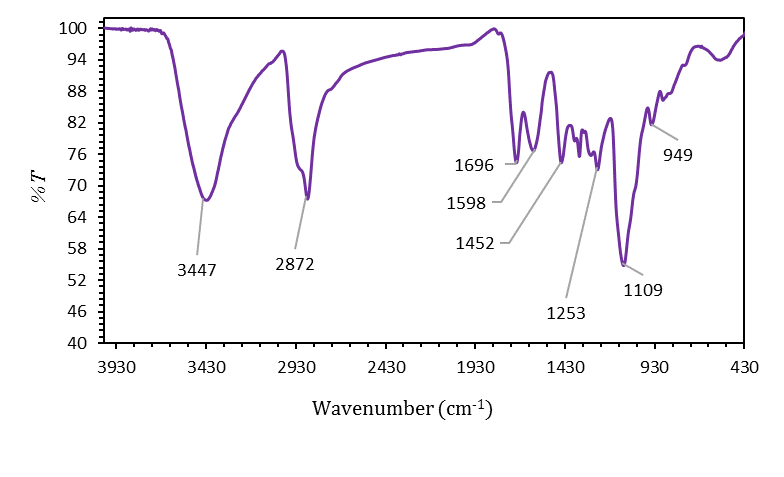


(a)


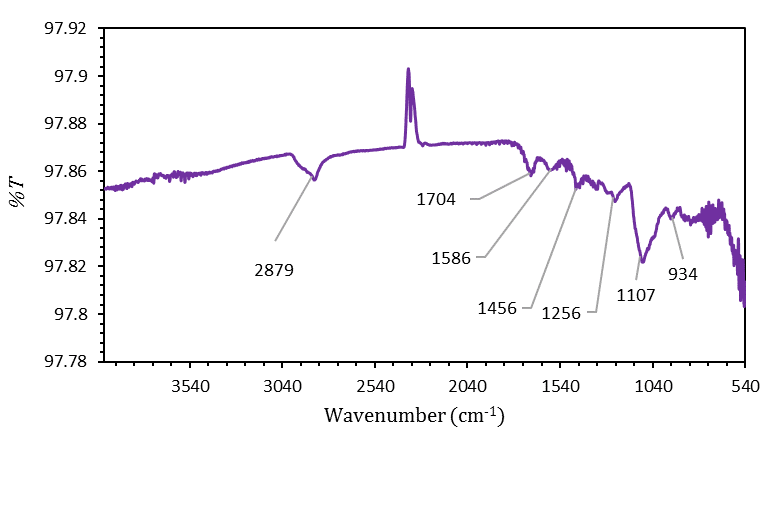


Fig. S4. (a) FT-IR and (b) ATR-IR spectra of the prepared carbon.

(b)

| RMS | R­2 | *α* | *n* | *b* | *a* | *F2* | *k*2  (g/mg.s) | *k1*  (1/s) | *k* | *qe*  (mg/g) | Kinetics model |
| --- | --- | --- | --- | --- | --- | --- | --- | --- | --- | --- | --- |
| 0.2279 | 0.9990 | - | - | - | - | - | - | 0.29 | - | 16.48 | PFO |
| 0.6142 | 0.9929 | - | - | - | - | - | 0.02 | - | - | 18.63 | PSO |
| 0.2629 | 0.9990 | - | - | - | - | 0.03 | - | 0.28 | - | 16.49 | MOE |
| 1.0359 | 0.9800 | - | - | 0.32 | 31.80 | - | - | - | - | - | Elovich |
| 0.2819 | 0.9988 | 2.04 | - | - | - | - | - | - | 8.0×10-3 | 16.66 | FL-PSO |
| 0.2630 | 0.9990 | 0.99 | - | - | - | - | - | - | 29×10-3 | 16.49 | FL-PFO |

Table S1. Obtained kinetic model parameters for the adsorption of methyl violet onto the prepared carbon (at 10 mg/l concentration).

| RMS | R­2 | *α* | *n* | *b* | *a* | *F2* | *k*2  (g/mg.s) | *k1*  (1/s) | *k* | *qe*  (mg/g) | Kinetics  model |
| --- | --- | --- | --- | --- | --- | --- | --- | --- | --- | --- | --- |
| 0.1115 | 0.9999 | - | - | - | - | - | - | 0.43 | - | 22.78 | PFO |
| 0.7438 | 0.9957 | - | - | - | - | - | 0.03 | - | - | 24.53 | PSO |
| 0.0485 | 0.9999 | - | - | - | - | -1.03 | - | 0.61 | - | 22.73 | MOE |
| 1.2859 | 0.9871 | - | - | 0.34 | 332.27 | - | - | - | - | - | Elovich |
| 0.0450 | 0.9999 | 3.60 | - | - | - | - | - | - | 2.1×10-3 | 22.74 | FL-PSO |
| 0.0486 | 0.9999 | 1.20 | - | - | - | - | - | - | 34×10-3 | 22.73 | FL-PFO |

Table S2. Obtained kinetic model parameters for the adsorption of methyl violet onto the prepared carbon (at 30 mg/l concentration).

| RMS | R­2 | *α* | *n* | *b* | *a* | *F2* | *k*2  (g/mg.s) | *k1*  (1/s) | *k* | *qe*  (mg/g) | Kinetic smodel |
| --- | --- | --- | --- | --- | --- | --- | --- | --- | --- | --- | --- |
| 0.6236 | 0.9953 | - | - | - | - | - | - | 0.29 | - | 20.49 | PFO |
| 0.7496 | 0.9932 | - | - | - | - | - | 0.02 | - | - | 22.63 | PSO |
| 0.7192 | 0.9953 | - | - | - | - | -0.15 | - | 0.31 | - | 20.46 | MOE |
| 1.0695 | 0.9863 | - | - | 0.31 | 75.20 | - | - | - | - | - | Elovich |
| 0.6764 | 0.9959 | 2.05 | - | - | - | - | - | - | 5.8×10-3 | 20.75 | FL-PSO |
| 0.7197 | 0.9953 | 1.03 | - | - | - | - | - | - | 28×10-3 | 20.47 | FL-PFO |

Table S3. Obtained kinetic model parameters for the adsorption of cationic blue onto the prepared carbon (at 10 mg/l concentration).

Table S4. Obtained kinetic model parameters for the adsorption of cationic blue onto the prepared carbon (at 30 mg/l concentration).

| RMS | R­2 | *α* | *n* | *b* | *a* | *F2* | *k*2  (g/mg.s) | *k1*  (1/s) | *k* | *qe*  (mg/g) | Kinetics  model |
| --- | --- | --- | --- | --- | --- | --- | --- | --- | --- | --- | --- |
| 1.2574 | 0.9942 | - | - | - | - | - | - | 0.23 | - | 37.20 | PFO |
| 2.3271 | 0.9802 | - | - | - | - | - | 7.1×10-3 | - | - | 42.06 | PSO |
| 0.5226 | 0.9992 | - | - | - | - | -2.67 | - | 0.48 | - | 36.60 | MOE |
| 3.5044 | 0.9552 | - | - | 0.13 | 39.15 | - | - | - | - | - | Elovich |
| 0.1060 | 0.9999 | 2.28 | - | - | - | - | - | - | 1.8×10-3 | 37.14 | FL-PSO |
| 0.5529 | 0.9991 | 1.45 | - | - | - | - | - | - | 13×10-3 | 36.60 | FL-PFO |

Table S5. Obtained isotherm model parameters for the adsorption of cationic blue onto the prepared carbon.

| R2 | *n* | *KMLF* | *KML* | *qm* (mg/g) | | | Isotherm Model |
| --- | --- | --- | --- | --- | --- | --- | --- |
| 0.9746  0.9870 | -  0.68 | -  54 | 58  - | | 38.45  41.40 | ML  MLF | |

| R2 | *n* | *KMLF* | *KML* | *qm* (mg/g) | | Isotherm Model | |
| --- | --- | --- | --- | --- | --- | --- | --- |
| 0.9697  0.9838 | -  1.90 | -  10746 | 10257  - | | 47.39  45.00 | | ML  MLF |

Table S6. Obtained isotherm model parameters for the adsorption of methyl violet onto the prepared carbon.

1.  Corresponding author. Tel.: +98 813 8282807; Fax: +98 813 8257404.

   E-mail address: sazizian@basu.ac.ir (S. Azizian). [↑](#footnote-ref-2)
